1 **Title**

2 Diagnostic accuracy of point-of-care testing (POCT) devices for postpartum haemorrhage: A  
3 protocol of a systematic review and meta-analysis

4  
5 **Author names and affiliations**

6 Eishin Nakamura<sup>1,2</sup>, Takahiro Mihara<sup>1</sup>, Yuriko Kondo<sup>1</sup>, Hisashi Noma<sup>3</sup>, Sayuri Shimizu<sup>1</sup>

7 <sup>1</sup>Department of Health Data Science, Yokohama City University Graduate School of Data Science,  
8 Yokohama, Japan

9 <sup>2</sup>Center for Maternal, Fetal and Neonatal Medicine, Saitama Medical Center, Saitama Medical  
10 University, Saitama, Japan

11 <sup>3</sup>The Institute of Statistical Mathematics, Tokyo, Japan

12

13 **Author list**

14 1. Eishin Nakamura

15 Department of Health Data Science, Yokohama City University Graduate School of Data Science,  
16 Yokohama, Japan

17 Center for Maternal, Fetal and Neonatal Medicine, Saitama Medical Center, Saitama Medical  
18 University, Saitama, Japan

19 2. Takahiro Mihara

20 Department of Health Data Science, Yokohama City University Graduate School of Data Science,  
21 Yokohama, Japan

22 3. Yuriko Kondo

23 Department of Health Data Science, Yokohama City University Graduate School of Data Science,  
24 Yokohama, Japan

25 4. Hisashi Noma

26 The Institute of Statistical Mathematics, Tokyo, Japan

27 5. Sayuri Shimizu

28 Department of Health Data Science, Yokohama City University Graduate School of Data Science,  
29 Yokohama, Japan

30

31 **Corresponding author**

32 Takahiro Mihara

33 Department of Health Data Science, Yokohama City University Graduate School of Data Science,  
34 Yokohama City University

35 22-2 Seto, Kanazawa-ku, Yokohama, Kanagawa

36 Tel: 81-45-787-2311

37 E-mail: meta.analysis.r@gmail.com

38 **Keywords:** postpartum haemorrhage, point-of-care testing devices, hypofibrinogenaemia

39

40

41 **ABSTRACT**

42 **Introduction**

43 In postpartum haemorrhage (PPH), coagulation factors, mainly fibrinogen, are exhausted early  
44 during the course of the disease, which can easily lead to disseminated intravascular coagulation  
45 (DIC) and cause maternal mortality. Although some studies have reported the efficacy of  
46 point-of-care testing (POCT) devices in detecting hypofibrinogenaemia, little research has been  
47 conducted on their usefulness in the diagnosis of PPH. We plan to perform a systematic review of  
48 the diagnostic accuracy of existing POCT devices for the diagnosis of hypofibrinogenaemia in PPH.

49 **Methods and analysis**

50 We plan to identify studies using POCT devices for PPH and perform a systematic review and  
51 meta-analysis of their accuracy of diagnosing hypofibrinogenaemia. The results of fibrinogen  
52 measurements using the conventional Clauss method are used as reference standards. Literature  
53 searches will be conducted using electronic databases (MEDLINE, Embase, Cochrane Database, and  
54 Web of Science), and two reviewers will screen independently from the search results. The eligible  
55 literature will be used to synthesise true positive, false positive, true negative, and false negative  
56 results for the diagnosis of hypofibrinogenaemia. We will estimate the diagnostic accuracy of POCT  
57 devices for diagnosing hypofibrinogenaemia in patients with PPH using the Reitsma-type bivariate  
58 random-effects synthesis model and the hierarchical summary receiver operating characteristic  
59 curve.

60 **Ethics and dissemination**

61 This systematic review will be conducted through the secondary use of literature extracted from  
62 electronic databases. There are no ethical issues associated with this research. The final integrated  
63 results will be submitted to a peer-reviewed journal.

64 **Protocol registration**

65 The study protocol was registered with University Hospital Medical Information Network Clinical  
66 Trials (UMIN000048272) and PROSPERO (CRD42023394785).

67 **Strengths and limitations of the study**

- 68
- 69 • Studies on the usefulness of POCT devices in the diagnosis of PPH are limited. Our study  
70 will perform a systematic review of the diagnostic accuracy of existing POCT devices for  
71 the diagnosis of hypofibrinogenaemia in PPH.
- 72
- 73 • The study will estimate the diagnostic accuracy of POCT devices using the Reitsma-type  
74 bivariate random-effects synthesis model and the hierarchical summary receiver operating  
75 characteristic curve.

- 76       • The threshold for diagnosing hypofibrinogenaemia, the definition of PPH, and the POCT  
77       devices used may vary between studies and could be a potential source of heterogeneity.  
78       Since most primary studies are observational, it is expected that many unpublished studies  
79       will exist.
- 80
- 81       • The applicability of the study results may be limited since this systematic review only  
82       pertains to the use of POCT devices in pregnant patients with PPH. The number of studies  
83       may be limited since there is a wide variety of POCT devices used in PPH.
- 84
- 85
- 86
- 87

## 88 **INTRODUCTION**

### 89 **Background**

90 Postpartum haemorrhage (PPH) causes massive blood loss during labour and is one of the leading  
91 causes of maternal death.(1) PPH often presents with severe coagulopathy complicated by  
92 disseminated intravascular coagulation (DIC). The level of fibrinogen in the blood, which is  
93 considered the first to fall below the haemostatic threshold is particularly important, and blood  
94 fibrinogen levels correlate with the severity of PPH.(2) Early diagnosis of hypofibrinogenaemia and  
95 the initiation of transfusion therapy are important for improving maternal outcomes.

96 Conventional fibrinogen testing using the Clauss method is time-consuming and expensive to be  
97 installed in primary medical facilities. In recent years, point-of-care testing (POCT) devices that  
98 simply estimate blood coagulation function have been used as an initial treatment for PPH, and there  
99 are reports of their usefulness in PPH.(3) Moreover, the POCT device allows for rapid testing at a  
100 low cost, and the test results correlate well with fibrinogen levels in conventional blood tests.(4)  
101 Although many reports on the effectiveness of POCT devices in clinical practice have been  
102 recognised in the fields of cardiovascular surgery(5) and emergency medicine(6), there are limited  
103 reports on their use in PPH. Since PPH has a different mechanism than other haemorrhagic diseases  
104 such as trauma or cardiac surgery, the usefulness of POCT in other diseases may not be directly  
105 applicable.

106 Early diagnosis of coagulopathy, especially hypofibrinogenaemia, in patients with PPH, and  
107 appropriate transfusion therapy may contribute to decreased total blood loss and mortality. Hence,  
108 early diagnosis of coagulopathy using POCT devices is important for improving the prognosis of  
109 PPH.

110

### 111 **Clinical role of the index test**

112 In clinical practice, dry haematology, thromboelastography, and thromboelastometry are commonly  
113 used POCT devices.

114 Dry haematology can directly and rapidly measure fibrinogen by measuring the viscosity of the  
115 magnetic particle motion signal using scattered light and calculating the fibrinogen value from the  
116 absorbance.(7) Therefore, it is reasonable to use it for the diagnosis of PPH, in which fibrinogen  
117 levels are particularly important, among other coagulation factors.

118 Thromboelastography enables the comprehensive evaluation of coagulation and haemostatic  
119 function, including the effect of platelets, using whole blood samples. For TEG6s®, the parameters  
120 that could be measured as actual values are 1. reaction time (R), 2. Kinetics (K), 3. Angle, 4.  
121 maximum amplitude (MA), 5. whole blood clot lysis index at 30 minutes after MA(Ly30), 6.  
122 amplitude 10(A-10) and 7. Functional fibrinogen (FLEV), 8. Activated clotting time (ACT) (8).  
123 TEG6s can simultaneously measure four different reagents: Citrated Kaolin (CK), Citrated Kaolin

124 with Heparinase (CKH), Citrated Rapid TEG (CRT), Citrated Functional Fibrinogen (CFF), and  
125 Citrated Rapid TEG (CRT).

126 The measurement principle of thromboelastometry is similar to that of thromboelastography but  
127 requires a large number of reagents and pipetting steps. (9) Thromboelastography and  
128 thromboelastometry often investigate and report parameters that correlate more with fibrinogen  
129 values since direct fibrinogen measurement is not possible.(10)

130

### 131 **Objectives**

132 The Population, Index tests, and Target condition (PIT) framework(11) in this study is shown in  
133 Table 1.(12)

134 Table 1: Population, Index tests, Target condition (PIT) framework

|                  |                                                                                                                                 |
|------------------|---------------------------------------------------------------------------------------------------------------------------------|
| Population       | Pregnant patients after 20 weeks gestation and postpartum patients.                                                             |
| Index tests      | The following POCT devices are defined as index tests.<br>1. Dry haematology<br>2. Thromboelastography<br>3. Thromboelastometry |
| Target condition | Hypofibrinogenemia in patients with PPH                                                                                         |

135 POCT, point-of-care testing; PPH, postpartum haemorrhage.

136 The purpose of this study is to perform a systematic review of the diagnostic accuracy of POCT  
137 devices in diagnosing hypofibrinogenaemia in patients with PPH. The population, index test, and  
138 target conditions are presented in Table 1. The reference standard for diagnosing  
139 hypofibrinogenaemia will be based on fibrinogen levels measured using the conventional Clauss  
140 method, and the cut-off value for diagnosing hypofibrinogenaemia will be determined based on the  
141 values set in each individual study. Figure 1 shows the clinical flowchart of the included studies.

142

### 143 **Significance of this review**

144 As mentioned above, there have been numerous reports on the usefulness of POCT devices in  
145 emergency medicine and cardiovascular surgery. However, there are few reports on their use in PPH.  
146 Compared to non-pregnant women, pregnant women are characterised by circulatory dynamics and  
147 blood coagulability. In pregnant women, the circulating blood volume is increased by up to 50%, all  
148 coagulation factor activities except for factor 13 are increased, and the fibrinolytic system is  
149 relatively suppressed.(12,13) Since fibrinogen requires the highest concentration of any coagulation  
150 factor during haemostasis, high-volume transfusion in the setting of PPH is easily complicated by  
151 dilutional coagulopathy.(14,15) In addition, PPH consumes large amounts of coagulation factors to  
152 stop bleeding from the placental abruption site, which may result in consumptive coagulopathy.(16)  
153 Since fibrinogen is the first to be consumed in these coagulation disorders, DIC progresses more

154 rapidly in PPH than in other haemorrhagic diseases. Therefore, given the unique aspects of  
155 pregnancy, it is necessary to investigate the effectiveness of POCT devices separately in patients  
156 with PPH.

157 If POCT devices demonstrate high diagnostic accuracy for detecting hypofibrinogenaemia in PPH,  
158 they can be used to guide treatment strategies for the early identification of coagulation disorders  
159 and appropriate transfusion therapy.

160

## 161 **METHODS AND ANALYSIS**

162 This systematic review and meta-analysis follows the Preferred Reporting Items for Systematic  
163 Reviews and Meta-Analyses (PRISMA) statement and the PRISMA-Diagnostic Test Accuracy  
164 (DTA) statement.(17,18) The study protocol was registered with University Hospital Medical  
165 Information Network Clinical Trials (UMIN000048272) and PROSPERO (CRD42023394785).

166

### 167 **Eligibility criteria**

#### 168 *Participants*

169 Pregnant women and postpartum women after 20 weeks gestation and patients with blood loss  
170 >1000 ml will be included. To examine the effectiveness of POCT devices in investigating the  
171 parameters of bleeding in pregnant women, studies that only include pregnant women with  
172 congenital coagulopathy will be excluded.

#### 173 *Setting*

174 Studies in which the initial treatment for PPH or follow-up after transfusion was administered with  
175 POCT will be included. Pilot studies conducted on healthy pregnant women and postpartum mothers  
176 will be excluded.

#### 177 *index test*

178 Only studies using Dry haematology (e.g. CG02N®), Thromboelastography (e.g. TEG®), or  
179 Thromboelastometry (e.g. ROTEM®) as an index test will be included.

#### 180 *reference standard*

181 Only studies that use the Clauss method for fibrinogen measurement as the reference standard will  
182 be included. There are three methods for measuring fibrinogen in blood: the Clauss method, the salt  
183 precipitation method, and the immunoassay method. The Clauss method is the most widely used  
184 internationally, and studies using salting-out and immunoassay methods are excluded.(19) A low  
185 blood fibrinogen level in pregnant women is reported to be a risk for PPH at  $\leq 200$  mg/dl and a risk  
186 for requiring massive blood transfusions at  $\leq 130$ – $155$  mg/dl.(20–22) The definition of  
187 hypofibrinogenaemia is inconsistent in the literature with fibrinogen  $\leq 150$  mg/dl and  $\leq 200$   
188 mg/dl.(23) We plan to collect the literature regardless of the cut-off value of hypofibrinogenaemia

189 and integrate the results, and we will conduct a subgroup analysis according to the cut-off value if  
190 there are a sufficient number of studies (i.e.,  $\geq$  five studies) for each cut-off value.

191 *target condition*

192 This study will include only PPH patients diagnosed with hypofibrinogenemia.

193 *Types of studies*

194 Only studies involving humans will be included, and literature on animals will be excluded. Studies  
195 will include randomised controlled trials (RCTs) and non-RCTs (non-randomised controlled trials,  
196 split time-series analyses, before/after comparisons, cohort studies, and case-control studies).  
197 Non-published studies (e.g. conference abstracts and clinical trial protocols) will also be included.

198

### 199 **Information sources and search strategy**

200 The literature will be searched using electronic databases such as MEDLINE, Embase, the Cochrane  
201 Database, and Web of Science, and references to the corresponding literature will also be evaluated.

202 A literature search of these databases will be conducted on 15/06/2023.

203 The search formula for PubMed is shown below in Table 2.

204

Table 2: The search strategy for PubMed

| Search Number | Query                                                                                                                         |
|---------------|-------------------------------------------------------------------------------------------------------------------------------|
| 1             | "postpartum hemorrhage"[MeSH Terms] OR (postpartum[tiab] AND hemorrhage[tiab])<br>OR (postpartum[tiab] AND haemorrhage[tiab]) |
| 2             | "point of care testing"[MeSH Terms] OR "Point-Of-Care"[tiab] OR (point*[tiab] AND<br>care[tiab] AND test*[tiab])              |
| 3             | dry[tiab] AND hematology[tiab]                                                                                                |
| 4             | "thrombelastography"[MeSH Terms] OR "Thromboelastometry"[tiab]                                                                |
| 5             | "blood coagulation tests"[MeSH Terms] OR (blood[tiab] AND coagulation[tiab] AND<br>test*[tiab])                               |
| 6             | "viscoelasti*" [tiab] AND ("haemostat*" [tiab] OR "hemostatics"[MeSH Terms] OR<br>"hemostasis"[MeSH Terms] )                  |
| 7             | #2 OR #3 OR #4 OR #5 OR #6 OR #7                                                                                              |
| 8             | #1 AND #7                                                                                                                     |

205

### 206 **Study selection**

207 *Data management and selection process*

208 The list of references obtained from the electronic databases will be scanned using literature  
209 management software (EndNote®) to remove duplicate references. The titles and abstracts will be  
210 screened by two independent reviewers (EN and YK) to assess the inclusion criteria. For references  
211 determined to be eligible by at least one of the two reviewers in the primary screening, we will



212 proceed to the secondary screening process using the full text. Secondary screening using the full  
213 text will be conducted for references that qualify in the primary screening and for those that cannot  
214 be determined to be eligible based on the title and abstract. Disagreements regarding the eligibility  
215 for the study will be resolved through discussion.

216

#### 217 *Data collection process*

218 Two independent reviewers (EN and YK) will extract data from the eligible literature. If there are  
219 discrepancies in data extraction between the two parties regarding the extraction of data, they will be  
220 resolved through discussion.

221

#### 222 *Data items*

223 Maternal age at delivery, weeks of delivery, primiparity, maternal body mass index, method of  
224 delivery (vaginal or cesarean), cause of PPH (atonic bleeding, perineal laceration, retained or  
225 adhered placenta, placental abruption, amniotic fluid embolism), total blood loss, total blood  
226 transfusion requirements (Red Cell Concentrate, Fresh Frozen Plasma, Platelet Concentrate,  
227 fibrinogen concentrate), maternal deaths, blood fibrinogen levels measured by the Clauss method at  
228 the time of POCT device use, type of POCT device used, measurement results of POCT devices [(1)  
229 dry-haematology: fibrinogen, (2) thromboelastography: R, K, MA, Ly30, A-10, FLEV, (3)  
230 thromboelastometry: CT, CF, CFT, alpha, A10, MCF, LI30, LI60, ML], and the number of patients in  
231 the true positive, false positive, true negative, and false positive will be collected as diagnostic  
232 accuracy for hypofibrinogenemia.

233

### 234 **Outcomes and prioritization**

#### 235 *Primary outcome*

236 The primary outcome is the diagnostic accuracy of the POCT device to determine  
237 hypofibrinogenemia. Hypofibrinogenemia is diagnosed based on the fibrinogen values measured  
238 using the Clauss method.

#### 239 *Secondary outcomes*

240 The secondary outcome is the correlation coefficient between the fibrinogen value measured using  
241 the Clauss method and the test values measured using POCT.

242

### 243 **Risk of bias in individual studies**

244 QUADAS-2 (24) will be used to assess the risk of bias for each study; QUADAS-2 is classified into  
245 the following four domains: (1) participant selection, (2) index test, (3) reference standard, and (4)  
246 flow and timing. For each domain, the risk of bias is classified as 'low', 'unclear', and 'high', and

247 concerns about applicability are also classified as 'low', 'unclear', and 'high'. Signalling questions are  
248 also included to facilitate the evaluation of the risk of bias for each domain.

249

### 250 **Data synthesis and meta-analysis**

251 Firstly, we will present the predictive accuracy measures of individual studies based on the reported  
252 counts of true positives, false positives, false negatives, and true negatives; sensitivities and  
253 specificities will be calculated, accompanied by their corresponding 95% confidence intervals.  
254 Coupled forest plots will be used to visualize sensitivities and specificities of POCT for diagnosing  
255 hypofibrinogenaemia. In addition, scatter plots will be generated for pairs of sensitivities and  
256 specificities to perform exploratory evaluations and assess heterogeneity.

257 Secondly, we will perform synthesis analyses using Reitsma's bivariate random-effects model to  
258 account for possible heterogeneities across studies based on study-specific sensitivities and  
259 specificities.(25) The results will be the summary estimates of sensitivities and specificities, along  
260 with their heterogeneity variances ( $\tau^2$ ). Furthermore, we will generate summary receiver operating  
261 characteristic (SROC) curves(26) based on bivariate random-effects model estimates and report the  
262 areas under the curves (AUCs) as a summary measure of diagnostic accuracy.(27,28) For statistical  
263 inference, we will employ standard restricted maximum likelihood estimation for Reitsma's  
264 model(25) and use the bootstrap method to calculate 95% confidence intervals for the AUCs of the  
265 SROC curves.(29) We will also perform a generalised Egger test for multivariate meta-analysis to  
266 assess potential publication bias.(30) Statistical analyses will be performed using R software (R  
267 Development Core Team, Vienna, Austria) and RStudio (RStudio, Boston, Massachusetts, USA).

268

### 269 **Confidence of cumulative evidence**

270 Once sufficient results have been obtained, the Grading of Recommendations, Assessment,  
271 Development, and Evaluations (GRADE) will be used to evaluate the certainty of evidence.(31)

272

### 273 **Subgroup analyses**

274 If different thresholds for hypofibrinogenaemia are adopted among the eligible studies, subgroup  
275 analyses will be considered according to the prespecified clinically relevant thresholds ( $\leq 150$  mg/dl,  
276  $\leq 200$  mg/dl). In addition, to evaluate possible heterogeneity, subgroup analyses will be performed  
277 based on the types of POCT devices used (dry haematology, thromboelastography, and  
278 thromboelastometry).

279

## 280 **DISCUSSION**

281 Early detection of hypofibrinogenaemia in PPH and appropriate coagulation factor replacement are  
282 crucial to improve the prognosis of PPH. However, no previous systematic review has reported the

283 usefulness of POCT devices in PPH. This systematic review focuses on the diagnostic accuracy of  
284 POCT for hypofibrinogenaemia and may provide data for the effective use of POCT devices in PPH.  
285 This study will focus on blood fibrinogen levels in patients with obstetric haemorrhage. Fibrinogen  
286 level is the most important coagulation index in the blood of patients with PPH. Although many  
287 coagulation factors are necessary for haemostasis, fibrinogen is required in the highest concentration  
288 in the blood.(32) When massive haemorrhage occurs due to PPH, high-volume intravenous infusion  
289 to maintain blood pressure can easily lead to dilutional coagulopathy.(33) Furthermore, there is a risk  
290 of consumptive coagulopathy, in which a large amount of coagulation factors is consumed to stop  
291 bleeding from the placental abruption surface. Moreover, fibrinogen is also the first to be  
292 consumed.(34) Therefore, it is reasonable to assume that early recognition of hypofibrinogenemia  
293 and appropriate blood transfusion therapy will improve the prognosis of PPH compared to other  
294 massive haemorrhages.

295 In PPH, early identification of hypofibrinogenaemia and administering fibrinogen concentrate may  
296 reduce the total amount of blood transfusion required and improve the prognosis.(23) Early  
297 diagnosis of hypofibrinogenaemia using POCT devices and the development of transfusion protocols  
298 may improve maternal outcomes in PPH and conserve medical resources, including transfusion  
299 products.(35) This systematic review aims to determine the effectiveness of POCT in the diagnosis  
300 of hypofibrinogenaemia in patients with PPH. If POCT devices are reliable for accurately diagnosing  
301 hypofibrinogenaemia and determining the minimum transfusion volume needed to correct  
302 coagulopathy, they could potentially increase maternal survival rates and reduce the burden on  
303 medical resources.

304

### 305 **Limitations and implications**

306 This systematic review has several limitations. First, the heterogeneity among the studies may be an  
307 issue. The threshold for diagnosing hypofibrinogenaemia, the definition of PPH, and the POCT  
308 devices used may vary between studies and could be a potential source of heterogeneity. Second,  
309 since most primary studies are observational, it is expected that many unpublished studies will exist.  
310 Third, the applicability of the study results may be limited since this systematic review only pertains  
311 to the use of POCT devices in pregnant patients with PPH. Fourth, the number of studies may be  
312 limited since there is a wide variety of POCT devices used in PPH. If there are insufficient reports  
313 for each device, the results of all POCT devices may be combined, making it difficult to determine  
314 the most effective device since there will be no direct comparison between the devices.

315

### 316 **ETHICS AND DISSEMINATION**

317 This systematic review will finally be submitted for publication in a peer-reviewed journal. The data  
318 used in this study do not include individual patient data, so there are no patient privacy concerns.

319 There are also no restrictions on the release of data. Any significant changes from this protocol will  
320 be described in detail.

321

### 322 **Acknowledgements**

323 We would like to thank Editage ([www.editage.com](http://www.editage.com)) for English-language editing.

324

### 325 **Author contributions**

326 Conceptualization: Ehisin Nakamura, Takahiro Mihara, Sayuri Shimizu

327 Methodology: Eishin Nakamura, Takahiro Mihara, Yuriko Kondo, Hisashi Noma

328 Supervision: Takahiro Mihara, Sayuri Shimizu, Hisashi Noma

329 Writing – Original Draft Preparation: Eishin Nakamura

330 Writing – Review & Editing: Eishin Nakamura, Takahiro Mihara, Yuriko Kondo, Hisashi Noma,  
331 Sayuri Shimizu.

332

### 333 **Competing Interests**

334 None declared.

335

### 336 **Funding**

337 This research received no specific grant from any funding agency in the public, commercial or  
338 not-for-profit sectors.

339

### 340 **Word count**

341 3876 words

342

### 343 **References:**

344 1. Say L, Chou D, Gemmill A, et al. Global causes of maternal death: a WHO systematic  
345 analysis. *Lancet Glob Health*. 2014;2:e323–33.

346 2. Era S, Matsunaga S, Matsumura H, et al. Usefulness of shock indicators for determining  
347 the need for blood transfusion after massive obstetric hemorrhage. *J Obstet Gynaecol Res*  
348 2015;41:39–43.

349 3. Collins PW, Cannings-John R, Bruynseels D, et al. Viscoelastometry guided fresh frozen  
350 plasma infusion for postpartum haemorrhage: OBS2, an observational study. *Br J Anaesth*  
351 2017;119:422–34.

352 4. Hayakawa M, Gando S, Ono Y, et al. Rapid evaluation of fibrinogen levels using the  
353 CG02N whole blood coagulation analyzer. *Semin Thromb Hemost* 2015;41:267–71.

- 354 5. Bolliger D, Tanaka KA. Point-of-care coagulation testing in cardiac surgery. *Semin*  
355 *Thromb Hemost* 2017;43:386–96.
- 356 6. Da Luz LT, Nascimento B, Shankarakutty AK, et al. Effect of thromboelastography  
357 (TEG®) and rotational thromboelastometry (ROTEM®) on diagnosis of coagulopathy, transfusion  
358 guidance and mortality in trauma: descriptive systematic review. *Crit Care*. 2014;18:1–26.
- 359 7. Ogawa S, Tanaka KA, Nakajima Y, et al. Fibrinogen measurements in plasma and whole  
360 blood: a performance evaluation study of the dry-hematology system. *Anesth Analg*.  
361 2015;120:18–25.
- 362 8. Othman M, Kaur H. Thromboelastography (TEG). *Methods Mol Biol* 2017;1646:533–43.
- 363 9. Schöchl H, Nienaber U, Hofer G, et al. Goal-directed coagulation management of major  
364 trauma patients using thromboelastometry (ROTEM®)-guided administration of fibrinogen  
365 concentrate and prothrombin complex concentrate. *Crit Care* 2010;14:1–11.
- 366 10. Lloyd-Donald P, Churilov L, Cheong B, et al. Assessing TEG6S reliability between  
367 devices and across multiple time points: A prospective thromboelastography validation study. *Sci*  
368 *Rep* 2020;10:7045.
- 369 11. Leeflang MM, Davenport C, Bossuyt PM. Chapter 6: Defining the review question. 2022.
- 370 12. Hill CC, Pickinpaugh J. Physiologic changes in pregnancy. *Surg Clin North Am*  
371 2008;88:391–401.
- 372 13. Hui C, Lili M, Libin C, et al. Changes in coagulation and hemodynamics during  
373 pregnancy: a prospective longitudinal study of 58 cases. *Arch Gynecol Obstet* 2012;285:1231–6.
- 374 14. Zentai C, Van Der Meijden PEJ, Braunschweig T, et al. Hemostatic therapy using  
375 tranexamic acid and coagulation factor concentrates in a model of traumatic liver injury. *Anesth*  
376 *Analg* 2016;123:38–48.
- 377 15. Levy JH, Szlam F, Tanaka KA, et al. Fibrinogen and hemostasis: a primary hemostatic  
378 target for the management of acquired bleeding. *Anesth Analg*. 2012;114:261–74.
- 379 16. Thachil J, Toh CH. Disseminated intravascular coagulation in obstetric disorders and its  
380 acute haematological management. *Blood Rev* 2009;23:167–76.
- 381 17. Moher D, Liberati A, Tetzlaff J, et al. Preferred reporting items for systematic reviews and  
382 meta-analyses: the PRISMA statement. *PLoS Med*. 2009;6:336–41.
- 383 18. McInnes MDF, Moher D, Thombs BD, McGrath TA, Bossuyt PM, Clifford T, et al.  
384 Preferred Reporting Items for a Systematic Review and Meta-analysis of Diagnostic Test Accuracy  
385 Studies: The PRISMA-DTA Statement. *JAMA*. 2018 Jan 23;319(4):388–96.
- 386 19. Stang LJ, Mitchell LG. Fibrinogen. *Methods in Molecular Biology*. 2013;992:181–92.
- 387 20. Cortet M, Deneux-Tharoux C, Dupont C, Colin C, Rudigoz RC, Bouvier-Colle MH, et al.  
388 Association between fibrinogen level and severity of postpartum haemorrhage: Secondary analysis  
389 of a prospective trial. *Br J Anaesth*. 2012;108(6):984–9.

- 390 21. Charbit B, Mandelbrot L, Samain E, Baron G, Haddaoui B, Keita H, et al. The decrease of  
391 fibrinogen is an early predictor of the severity of postpartum hemorrhage. *Journal of Thrombosis and*  
392 *Haemostasis*. 2007 Feb 1;5(2):266–73.
- 393 22. Wang L, Matsunaga S, Mikami Y, Takai Y, Terui K, Seki H. Pre-delivery fibrinogen  
394 predicts adverse maternal or neonatal outcomes in patients with placental abruption. *Journal of*  
395 *Obstetrics and Gynaecology Research*. 2016 Jul 1;42(7):796–802.
- 396 23. Matsunaga S, Takai Y, Seki H. Fibrinogen for the management of critical obstetric  
397 hemorrhage. *J Obstet Gynaecol Res*. 2019 Jan 1;45(1):13–21.
- 398 24. Whiting PF, Rutjes AWS, Westwood ME, Mallett S, Deeks JJ, Reitsma JB, et al.  
399 QUADAS-2: a revised tool for the quality assessment of diagnostic accuracy studies. *Ann Intern*  
400 *Med*. 2011 Oct 18;155(8):529–36.
- 401 25. Reitsma JB, Glas AS, Rutjes AWS, Scholten RJPM, Bossuyt PM, Zwinderman AH.  
402 Bivariate analysis of sensitivity and specificity produces informative summary measures in  
403 diagnostic reviews. *J Clin Epidemiol*. 2005;58:982–90.
- 404 26. Rutter CM, Gatsonis CA. A hierarchical regression approach to meta-analysis of  
405 diagnostic test accuracy evaluations. *Stat Med* 2001;20:2865–84.
- 406 27. Leeflang MMG, Deeks JJ, Gatsonis C, et al. Systematic reviews of diagnostic test  
407 accuracy. *Ann Intern Med* 2008;149:889–97.
- 408 28. Macaskill P, Gatsonis C, Deeks J, et al. *Cochrane Handbook for Systematic Reviews of*  
409 *Diagnostic Test Accuracy*.
- 410 29. Noma H, Matsushima Y, Ishii R. Confidence interval for the AUC of SROC curve and  
411 some related methods using bootstrap for meta-analysis of diagnostic accuracy studies. *Commun*  
412 *Stat Case Stud Data Anal Appl* 2020;7:344–58.
- 413 30. Hong C, Salanti G, Morton SC, et al. Testing small study effects in multivariate  
414 meta-analysis. *Biometrics*. 2020;76:1240.
- 415 31. GRADE Working Group. Grading quality of evidence and strength of recommendations.  
416 *BMJ*. 2004;328:1490–4.
- 417 32. Hiippala ST, Myllyla GJ, Vahtera EM. Hemostatic factors and replacement of major blood  
418 loss with plasma-poor red cell concentrates. *Anesth Analg* 1995;81:360–5.
- 419 33. Levy JH, Szlam F, Tanaka KA, et al. Fibrinogen and hemostasis: a primary hemostatic  
420 target for the management of acquired bleeding. *Anesth Analg* 2012;114:261–74.
- 421 34. Thachil J, Toh CH. Disseminated intravascular coagulation in obstetric disorders and its  
422 acute haematological management. *Blood Rev* 2009;23:167–76.
- 423 35. Snegovskikh D, Souza D, Walton Z, et al. Point-of-care viscoelastic testing improves the  
424 outcome of pregnancies complicated by severe postpartum hemorrhage. *J Clin Anesth* 2018;44:50–6.  
425

426 **Figure legend:**

427 Figure 1: clinical flowchart of postpartum haemorrhage (PPH) patients

428

429

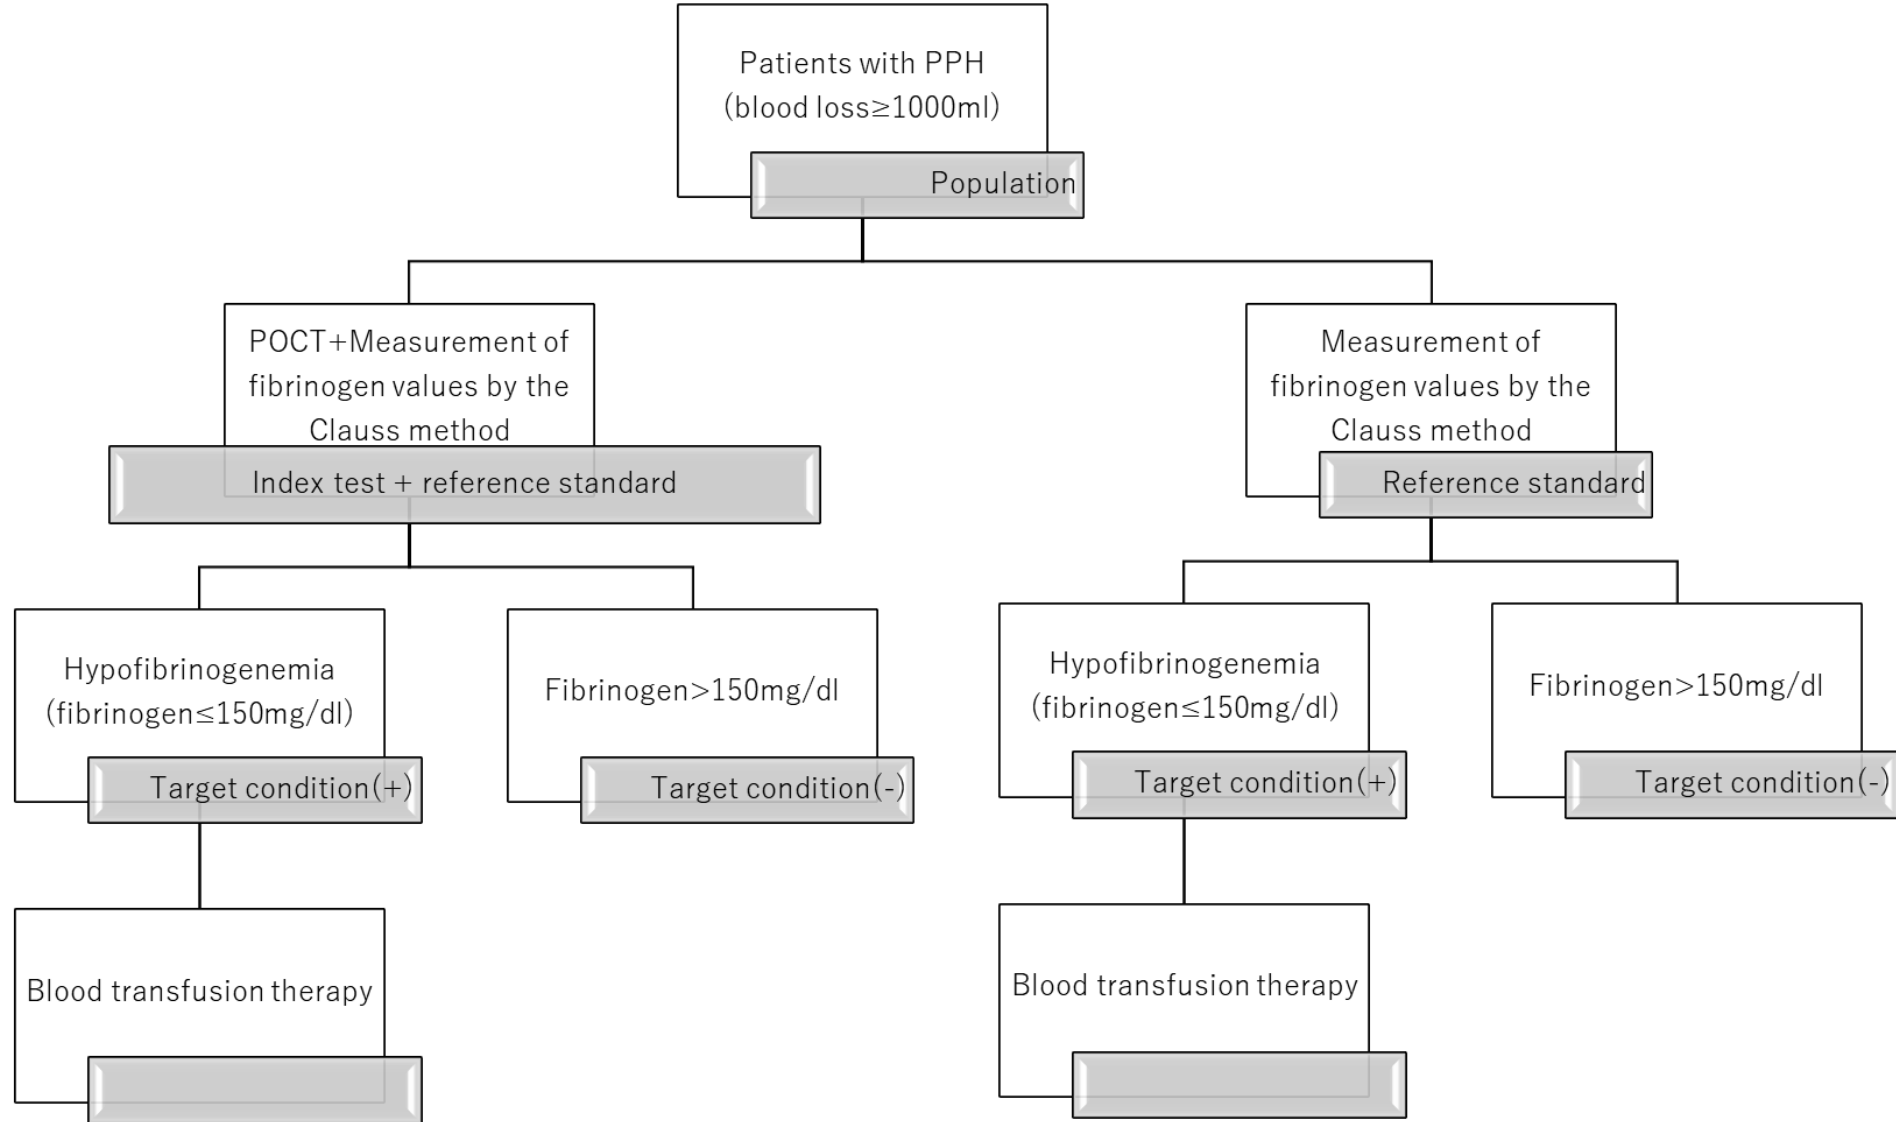

Source: https://medrxiv.org/content/10.1101/2023.06.11.23291255v1.full.pdf
